# Supplementary material for: A smart MnO2-doped graphene oxide nanosheet for enhanced chemo-photodynamic combinatorial therapy via simultaneous oxygenation and glutathione depletion
Source: PubMed Central journal article supplement — Acta Pharm Sin B. 2020 Aug 7;11(3):823–34. doi: 10.1016/j.apsb.2020.07.021 (PMC7982425; doi:10.1016/j.apsb.2020.07.021), 2020-08-07
Supplement: mmc1.pdf [file mmc1.pdf]

## Supporting Information for

### ORIGINAL ARTICLE

#### A smart MnO<sub>2</sub>-doped graphene oxide nanosheet for enhanced chemo-photodynamic combinatorial therapy *via* simultaneous oxygenation and glutathione depletion

Peng Liu<sup>a</sup>, Xin Xie<sup>b</sup>, Miao Liu<sup>a</sup>, Shuo Hu<sup>c,d</sup>, Jinsong Ding<sup>a</sup>, Wenhui Zhou<sup>a,b,d,\*</sup>

<sup>a</sup>Xiangya School of Pharmaceutical Sciences, Central South University, Changsha 410013, China

<sup>b</sup>School of Pharmaceutical Sciences, Gannan Medical University, Ganzhou 341000, China

<sup>c</sup>Department of Nuclear Medicine, Xiangya Hospital, Central South University, Changsha 410008, China

<sup>d</sup>Key Laboratory of Biological Nanotechnology of National Health Commission, Changsha 410008, China

Received 12 May 2020; received in revised form 19 July 2020; accepted 21 July 2020

\*Corresponding author.

E-mail address: zhouwenhuyaoji@163.com (Wenhui Zhou).

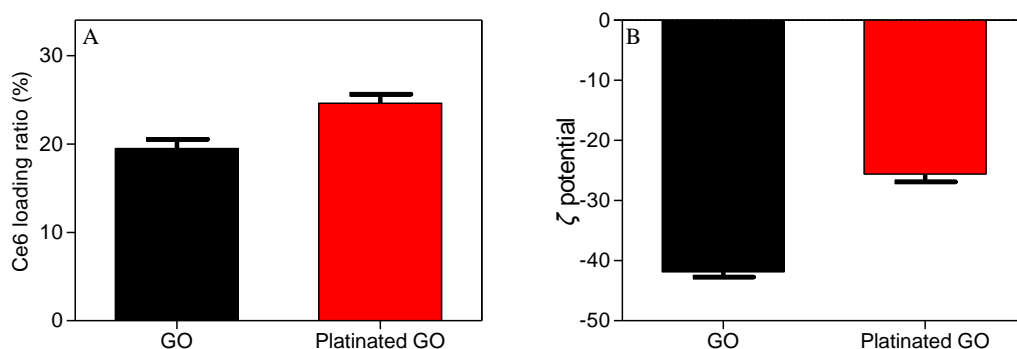

**Figure S1** The Ce6 loading capacity (A) and  $\zeta$  potential (B) of GO before and after platination. Data are expressed as mean  $\pm$ SD ( $n=2$ ).

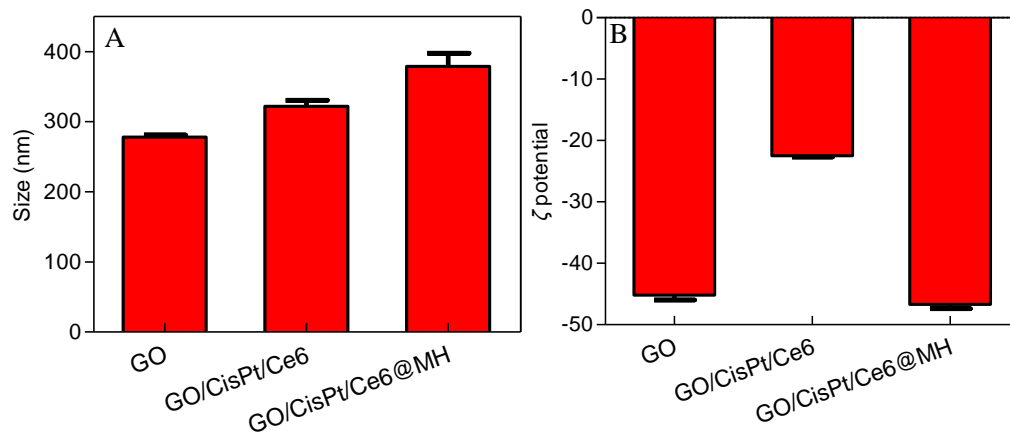

**Figure S2** The particle size (A) and  $\zeta$  potential (B) of GO, GO/CisPt/Ce6 and GO/CisPt/Ce6@MH. Data are expressed as mean  $\pm$ SD ( $n=3$ ).

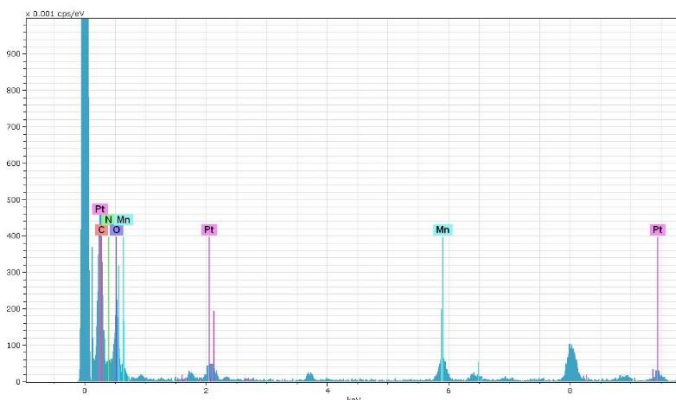

**Figure S3** Energy Dispersive X-Ray spectroscopy (EDS) analysis of GO/CisPt/Ce6@MH.

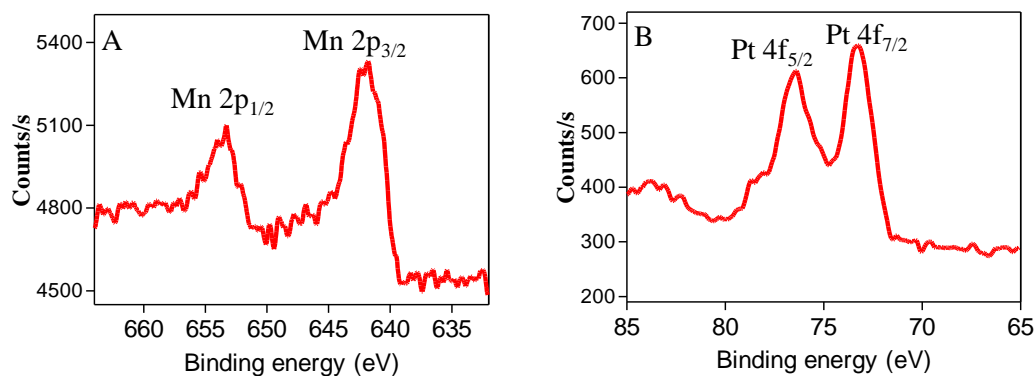

**Figure S4** The Mn 2p (A) and Pt 4f (B) spectra of GO/CisPt/Ce6@MH from XPS analysis.

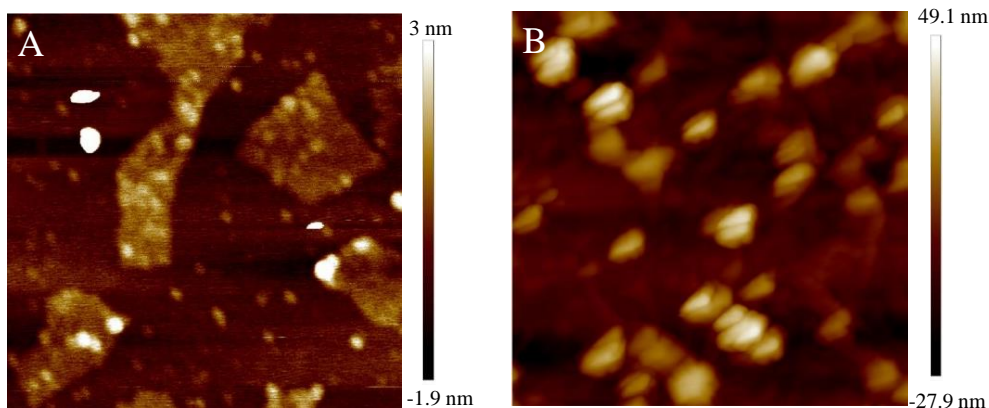

**Figure S5** AFM images of (A) GO/CisPt/Ce6 and (B) GO/CisPt/Ce6@MH.

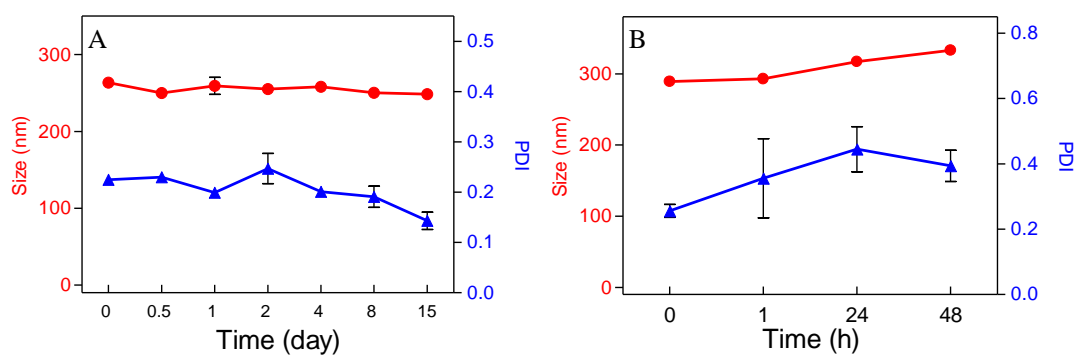

**Figure S6** Stability test of GO/CisPt/Ce6@MH by measuring the particle size and polydispersity index (PDI). (A) The long-term stability in aqueous solution. (B) Stability in cell culturing medium at 37 °C for 48 h incubation. Data are expressed as mean  $\pm$ SD ( $n = 2$ ).

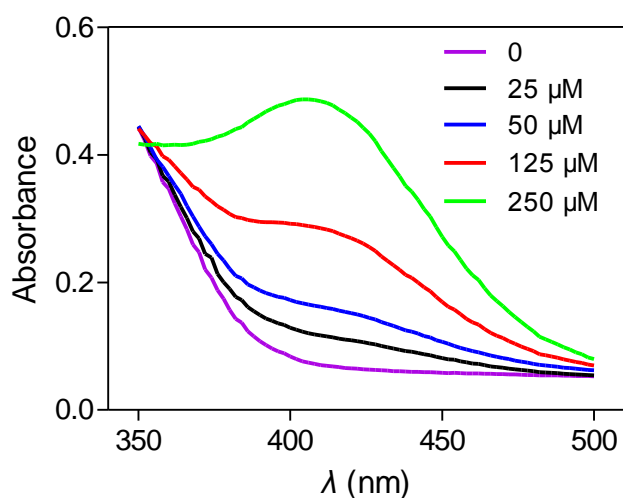

**Figure S7** The UV absorbance from 350 to 500 nm to probe the interaction between Ellman's reagent and various concentrations of GSH, and a characteristic UV absorbance peak at 405 nm can be used for GSH quantification.

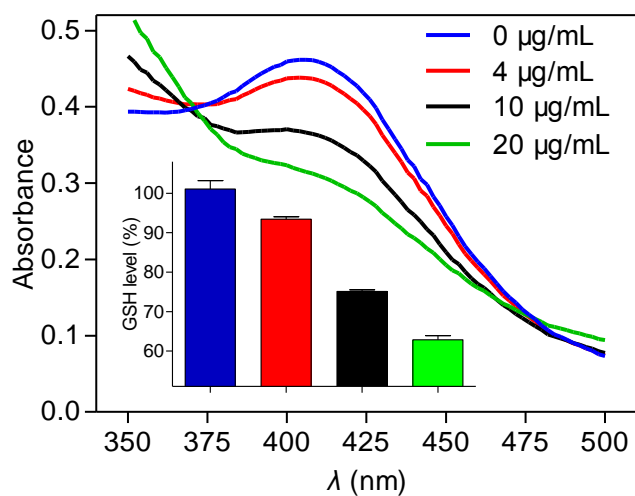

**Figure S8** UV-Visible absorbance spectra indicating the GSH depletion by various concentrations of GO/CisPt/Ce6@MH after 30 min incubation. Inset: the quantification of GSH depletion by various concentrations of GO/CisPt/Ce6@MH.

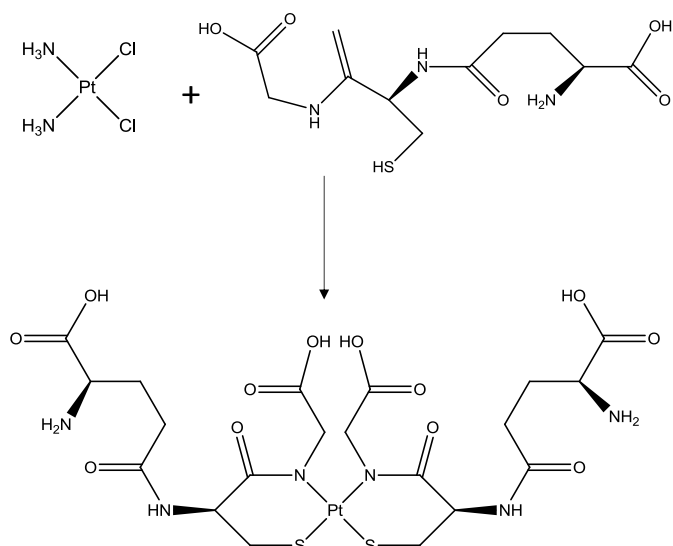

**Figure S9** The mechanism of CisPt detoxification upon reacting with GSH.

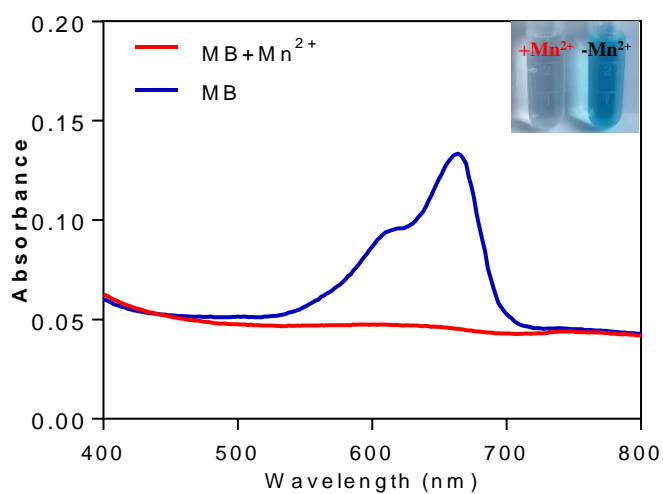

**Figure S10** UV–Visible absorbance spectra and photographs of MB solution (containing 25 mmol/L HCO<sub>3</sub><sup>-</sup> and 8 mmol/L H<sub>2</sub>O<sub>2</sub>) in presence and absence of 0.2 mmol/L Mn<sup>2+</sup> for 30 min. The decreased UV absorbance and faded color indicated the Fenton-like activity.

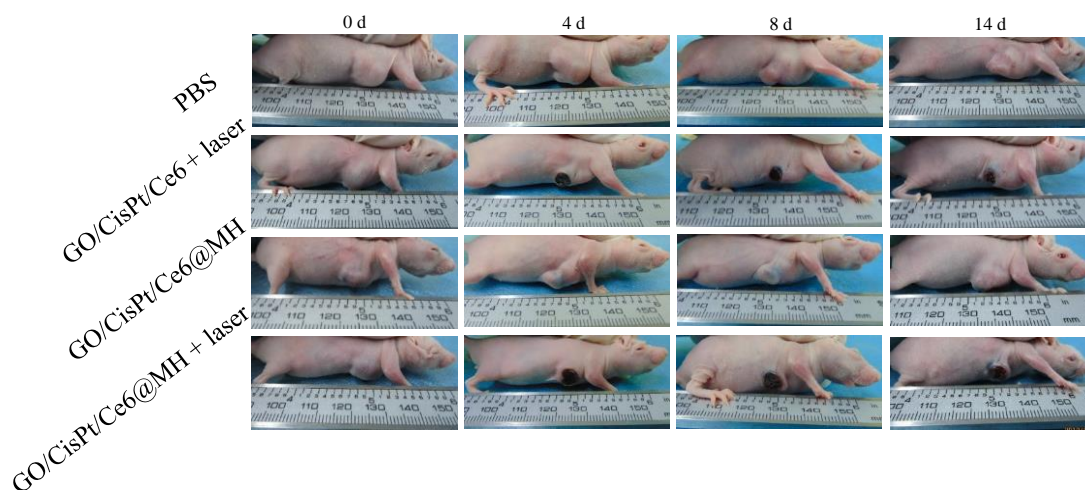

**Figure S11** The photographs of mice with different treatment on different days.

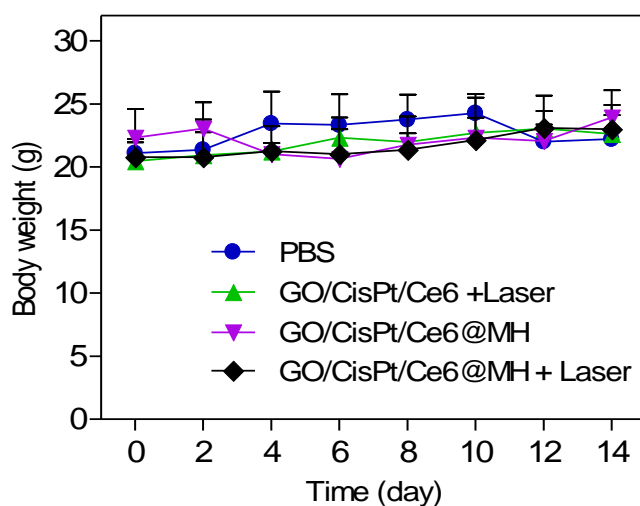

**Figure S12** Average body weights of mice with different treatments. Data are expressed as mean  $\pm$ SD ( $n = 5$ ).

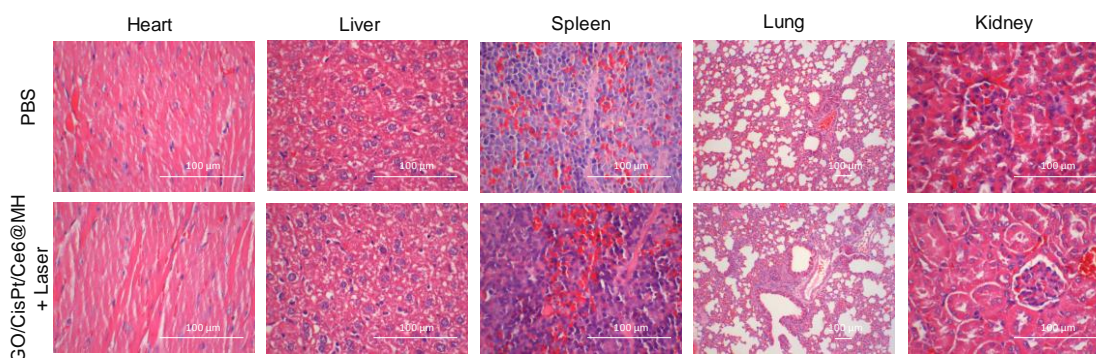

**Figure S13** H&E staining images of the major organs (heart, liver, spleen, lung, and kidney) treated with PBS or GO/CisPt/Ce6@MH + Laser.
